# Supplementary material for: Robotic technology for palliative and supportive care: Strengths, weaknesses, opportunities and threats
Source: PubMed Central journal article supplement — Palliat Med. 2019 Jun 28;33(8):1106–13. doi: 10.1177/0269216319857628 (PMC6691596; doi:10.1177/0269216319857628), 2019-06-28
Supplement: 857628_supp_mat.pdf [file 857628_supp_mat.pdf]

## **SUPPLEMENTARY FILES**

### **Development of the Nao robot**

The Nao robot (developed by SoftBank Robotics[1]) is an autonomous, programmable humanoid robot that is controlled by a Linux-based operating system called ROS (Robot Operating System) (Figure 1). The robot has capabilities for voice recognition and sound localisation (in-built microphones), multilingual text-to-speech synthesis (in-built speakers) and vision, which include facial and shape recognition (in-built high definition camera). The Nao robot was chosen for this project as it is widely used as a reference standard for research and education sectors.[1-4]

**The SWOT analysis was developed from presentation of the Nao robot at the following events.**

1. A public evening debate with a multi-professional audience including the computer scientists, academics, clinicians, social scientists, ethicists and members of the public (University of Liverpool).
2. A computer science workshop attended by computer scientists, data experts and healthcare professionals (University of Liverpool).
3. A round table discussion with five lay representatives (volunteers in palliative care) (the Winter Forum of the Palliative Care Institute Liverpool, University of Liverpool) and
4. Discussion following a presentation at an international conference (the Association of Palliative Medicine (APM) Annual Supportive & Palliative Care (ASP) conference, Belfast, 2017[5])

### **Figure 1: The Nao Robot**

### **Programming the Nao Robot**

The robot was programmed by a computer scientist (B.S) using Python (version 2.7) and NAOqi (the operating system that runs on the Nao). The Graphical User Interface was developed to enable an operator to control the Nao using a laptop (Figure 2). The Nao was programmed to convey ten emotions (relaxed, anger,

withdrawn/sad, lightly crying, heavy sobbing, happy/excited, scared, tired, laughing and dancing), which were demonstrated through manipulation of the posture, movement and speech.

**Figure 2: The graphical user interface used to control the Nao robot**

Once programmed, the Nao robot was demonstrated to computer scientists, and a palliative care physician. The set-up involved the robot in the robotics laboratory, on the flat surface floor, with the operator controlling the robot’s movements with a laptop. The operator demonstrated the robot’s speech capabilities (using text-to-speech synthesis) and emotional responses. A summary of the responses is provided in Table 1 and Figure 3.

**SUPPLEMENTARY TABLE: Description of the emotional responses displayed by the Nao robot**

|                | <b>Description of action (originating from the prone position)</b>                                                                                      |
|----------------|---------------------------------------------------------------------------------------------------------------------------------------------------------|
| Relaxed        | Basic awareness functions. Swaying action. Face tracking. White eye light emitting diodes (LEDs).                                                       |
| Anger          | Disable basic awareness and face-tracking, red eye LEDs, play selected growling sound, simultaneously raise arms and fists up in aggressive manner.     |
| Withdrawn/Sad  | Turn away from the direction faced (if standing), disable basic awareness and face tracking, dark blue eye LEDs, lower head, arms remain by side.       |
| Lightly crying | Disable basic awareness and face-tracking, cyan eye LEDs, play selected crying sound, hold arms to chest and raise and lower head to simulate sniffing. |
| Heavy sobbing  | Disable basic awareness and face-tracking, cyan eye LEDs, play selected sobbing sound, raise hands/arms to face and shake head to simulate sobbing.     |

|               |                                                                                                                                                                                                                                            |
|---------------|--------------------------------------------------------------------------------------------------------------------------------------------------------------------------------------------------------------------------------------------|
| Happy/Excited | Enable basic awareness and face tracking, magenta eye LEDs, Nao says "Woo hoo!" raise arms in celebration before lowering again.                                                                                                           |
| Scared        | Disable basic awareness and face-tracking, yellow eye LEDs, play selected gasping sound, raise hand to mouth to simulate shock followed by raising the other arm to simulate hiding.                                                       |
| Tired         | Disable basic awareness and face-tracking, white eye LEDs, play selected yawning sound, raise and then lower arms in a circle to simulate yawning.                                                                                         |
| Laughing      | Enable basic awareness and face-tracking, white eye LEDs, play selected laughing sound, raise hands to torso and raise and lower head to simulate laughing.                                                                                |
| Dancing       | Left arm is brought up from side and brought outwards. Head looks left and back to centre. Action is repeated with left arm and head. Both arms are lifted up and down alternatively in front of body with head rocking from side to side. |

**Figure 3: Postures of the Nao robot to represent emotional responses**

## REFERENCES

1. SoftBank Robotics. Who is NAO? Website of SoftBank Robotics2018 [cited 2018 18th April 2018]. Available from: <https://www.ald.softbankrobotics.com/en/robots/nao>.
2. Rosi A, Dall'Asta M, Brighenti F, Del Rio D, Volta E, Baroni I, et al. The use of new technologies for nutritional education in primary schools: a pilot study. (1476-5616 (Electronic)).
3. Shamsuddin S, Yussof H, Ismail L, Hanapiah FA, Mohamed S, Piah HA, et al., editors. Initial response of autistic children in human-robot interaction therapy with humanoid robot NAO. Signal Processing and its Applications (CSPA), 2012 IEEE 8th International Colloquium on; 2012: IEEE.
4. Shamsuddin S, Yussof H, Ismail LI, Mohamed S, Hanapiah FA, Zahari NI. Humanoid robot NAO interacting with autistic children of moderately impaired intelligence to augment communication skills. Procedia Engineering. 2012;41:1533-8.

5. Sturgeon B, Payne T, Mason S, Nwosu A. Robotic technology and palliative care education: the development of a 'nao robot' computer program. *BMJ Supportive & Palliative Care*. 2017;7(Suppl1 A2.4).
