# Supplementary material for: Robotic technology for palliative and supportive care: Strengths, weaknesses, opportunities and threats
Source: PubMed Central journal article supplement — Palliat Med. 2019 Jun 28;33(8):1106–13. doi: 10.1177/0269216319857628 (PMC6691596; doi:10.1177/0269216319857628), 2019-06-28
Supplement: 857628_supp_mat_table.pdf [file 857628_supp_mat_table.pdf]

**SUPPLEMENTARY TABLE: Description of the emotional responses displayed by the Nao robot**

|                | <b>Description of action (originating from the prone position)</b>                                                                                                                                                                         |
|----------------|--------------------------------------------------------------------------------------------------------------------------------------------------------------------------------------------------------------------------------------------|
| Relaxed        | Basic awareness functions. Swaying action. Face tracking. White eye light emitting diodes (LEDs).                                                                                                                                          |
| Anger          | Disable basic awareness and face-tracking, red eye LEDs, play selected growling sound, simultaneously raise arms and fists up in aggressive manner.                                                                                        |
| Withdrawn/Sad  | Turn away from the direction faced (if standing), disable basic awareness and face tracking, dark blue eye LEDs, lower head, arms remain by side.                                                                                          |
| Lightly crying | Disable basic awareness and face-tracking, cyan eye LEDs, play selected crying sound, hold arms to chest and raise and lower head to simulate sniffing.                                                                                    |
| Heavy sobbing  | Disable basic awareness and face-tracking, cyan eye LEDs, play selected sobbing sound, raise hands/arms to face and shake head to simulate sobbing.                                                                                        |
| Happy/Excited  | Enable basic awareness and face tracking, magenta eye LEDs, Nao says "Woo hoo!" raise arms in celebration before lowering again.                                                                                                           |
| Scared         | Disable basic awareness and face-tracking, yellow eye LEDs, play selected gasping sound, raise hand to mouth to simulate shock followed by raising the other arm to simulate hiding.                                                       |
| Tired          | Disable basic awareness and face-tracking, white eye LEDs, play selected yawning sound, raise and then lower arms in a circle to simulate yawning.                                                                                         |
| Laughing       | Enable basic awareness and face-tracking, white eye LEDs, play selected laughing sound, raise hands to torso and raise and lower head to simulate laughing.                                                                                |
| Dancing        | Left arm is brought up from side and brought outwards. Head looks left and back to centre. Action is repeated with left arm and head. Both arms are lifted up and down alternatively in front of body with head rocking from side to side. |
